# Supplementary material for: Nesprin-2-dependent ERK1/2 compartmentalisation regulates the DNA damage response in vascular smooth muscle cell ageing
Source: PubMed Central journal article supplement (PMC4532777; doi:10.1038/cdd.2015.12), 2015-03-06
Supplement: cdd201512x1.pdf [file cdd201512x1.pdf]

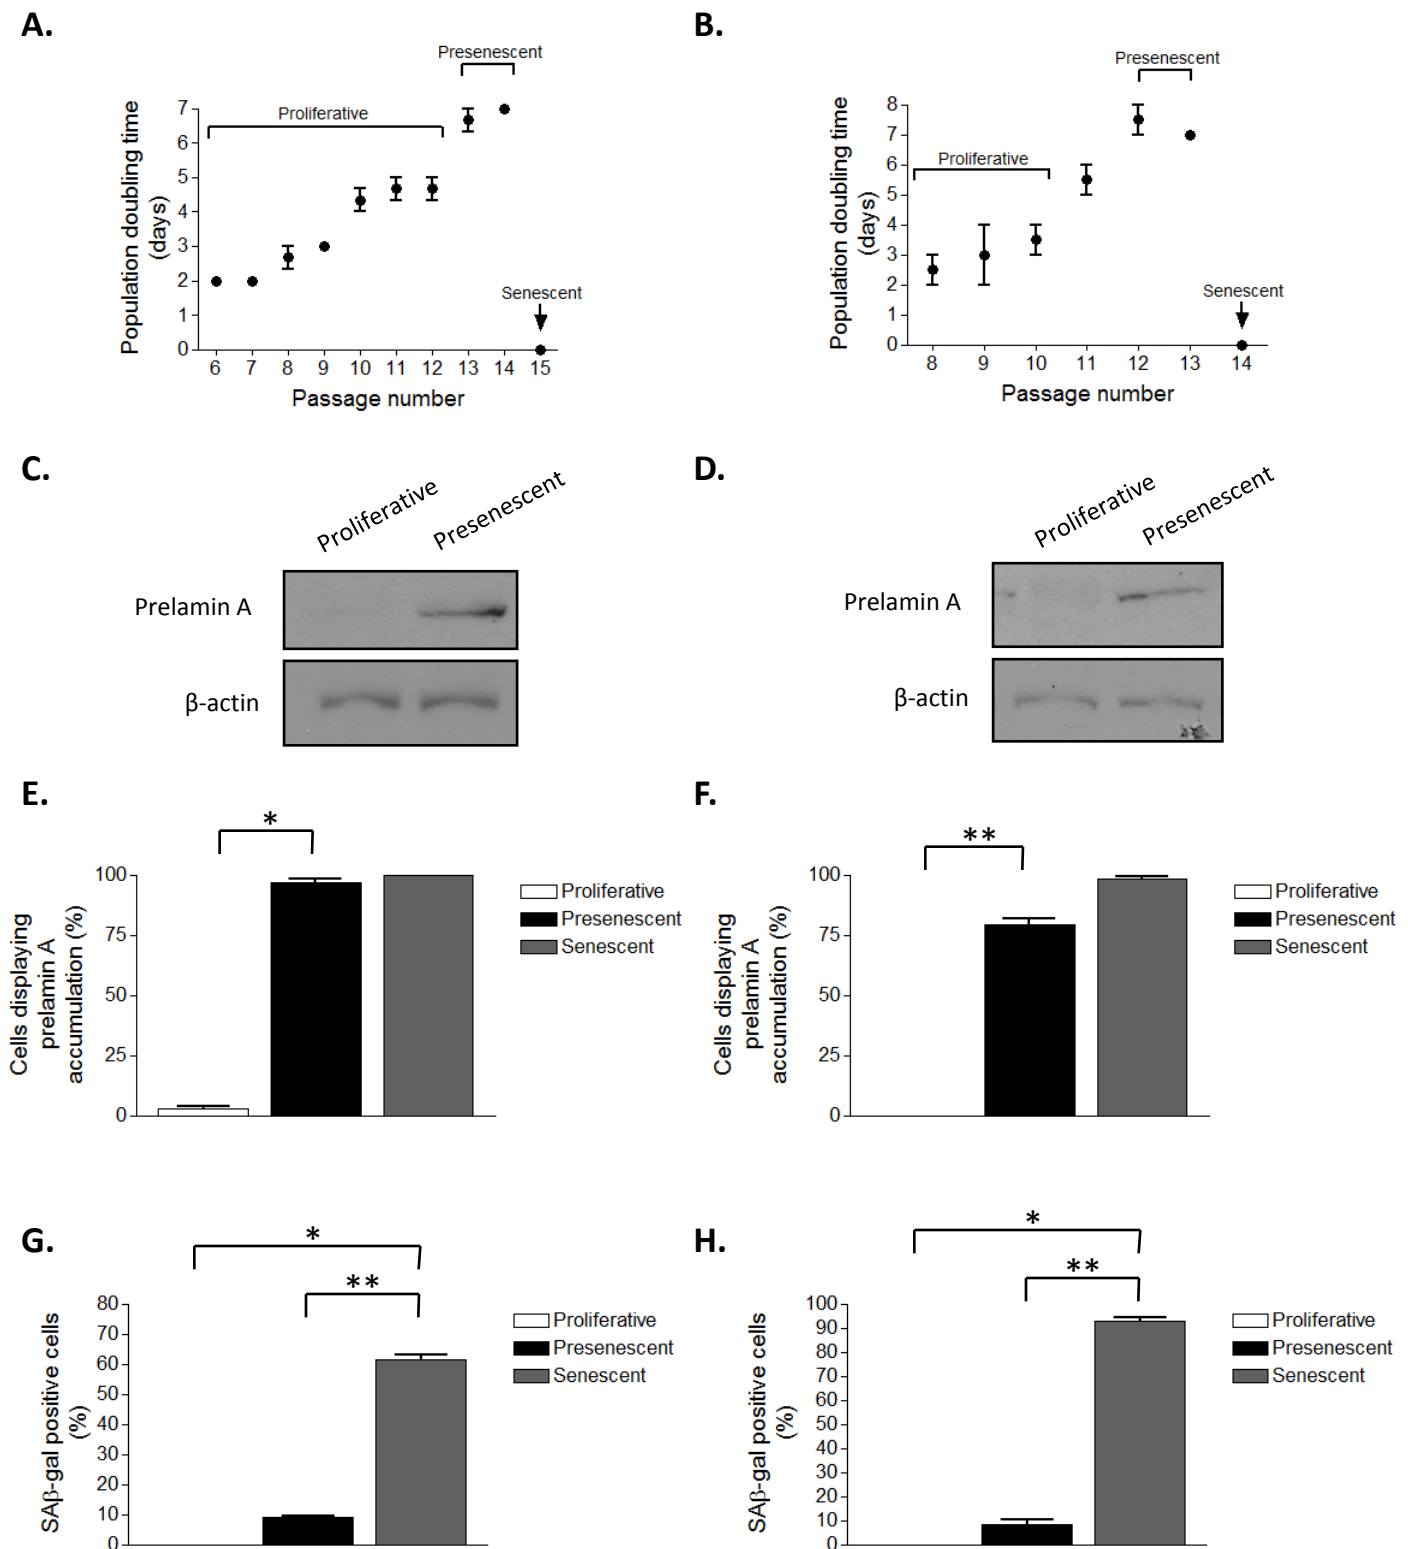

**Supplementary Figure 1.** Growth curves and prelamin A accumulation of 35F and 52M VSMC lines. PDT of A) 35F and B) 52M VSMCs grown *in vitro*. Each graph shows combined data of 3 independent experiments. WBs showing prelamin A accumulation in C) 35F and D) 52M VSMCs in presenescence. Graphs show combined data of independent experiments counting the percentage of cells displaying prelamin A accumulation determined by IF for E) 35F (\* $p < 0.0001$ ) and F) 52M (\*\* $p < 0.0001$ ) VSMCs. Quantification of percentage of cells staining positive for SA- $\beta$ gal for G) 35F (\* $p < 0.0001$  and \*\* $p < 0.0001$ ) and H) 52M (\* $p < 0.0001$  and \*\* $p < 0.0001$ ) VSMCs. Graphs show combined data for 3 independent experiments.

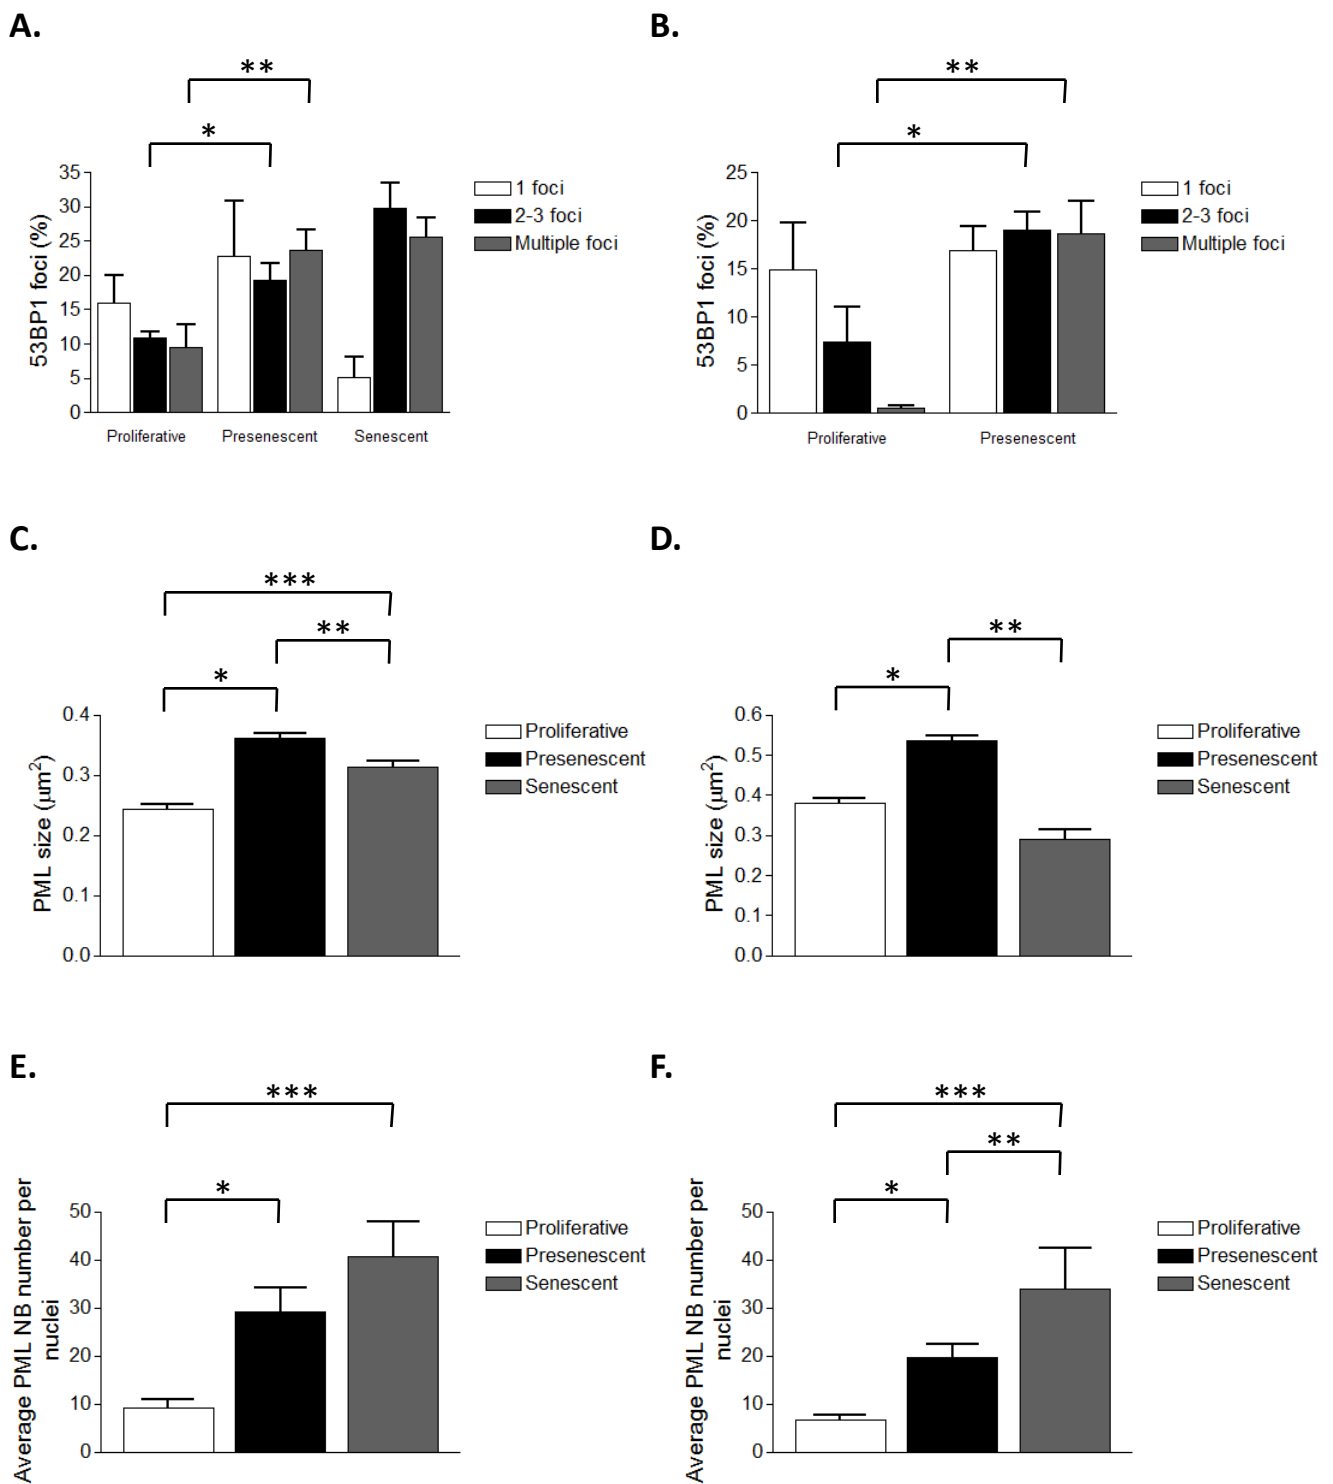

**Supplementary Figure 2.** 53BP1 foci and PML NB analysis of 35F and 52M VSMC lines. 53BP1 foci analysis for proliferative, presenescent and senescent A) 52M (\* $p=0.0357$  and \*\* $p=0.0324$ ) and B) 35F (\* $p=0.0481$  and \*\* $p=0.0061$ ) VSMCs. Average PML size in proliferative, presenescent and senescent C) 52M (\* $p<0.0001$ , \*\* $p<0.0001$  and \*\*\* $p<0.0001$ ) and D) 35F (\* $p<0.0001$ , \*\* $p<0.0001$  and \*\* $p=0.05$ ) VSMCs. Average PML number per nuclei in proliferative, presenescent and senescent E) 52M (\* $p=0.01$ , \*\* $p<0.001$ ) and F) 35F (\* $p=0.05$ , \*\* $p=0.05$  and \*\*\* $p=0.01$ ) VSMCs. Graphs represent combined data from 3 individual experiments analysing 300 cells.

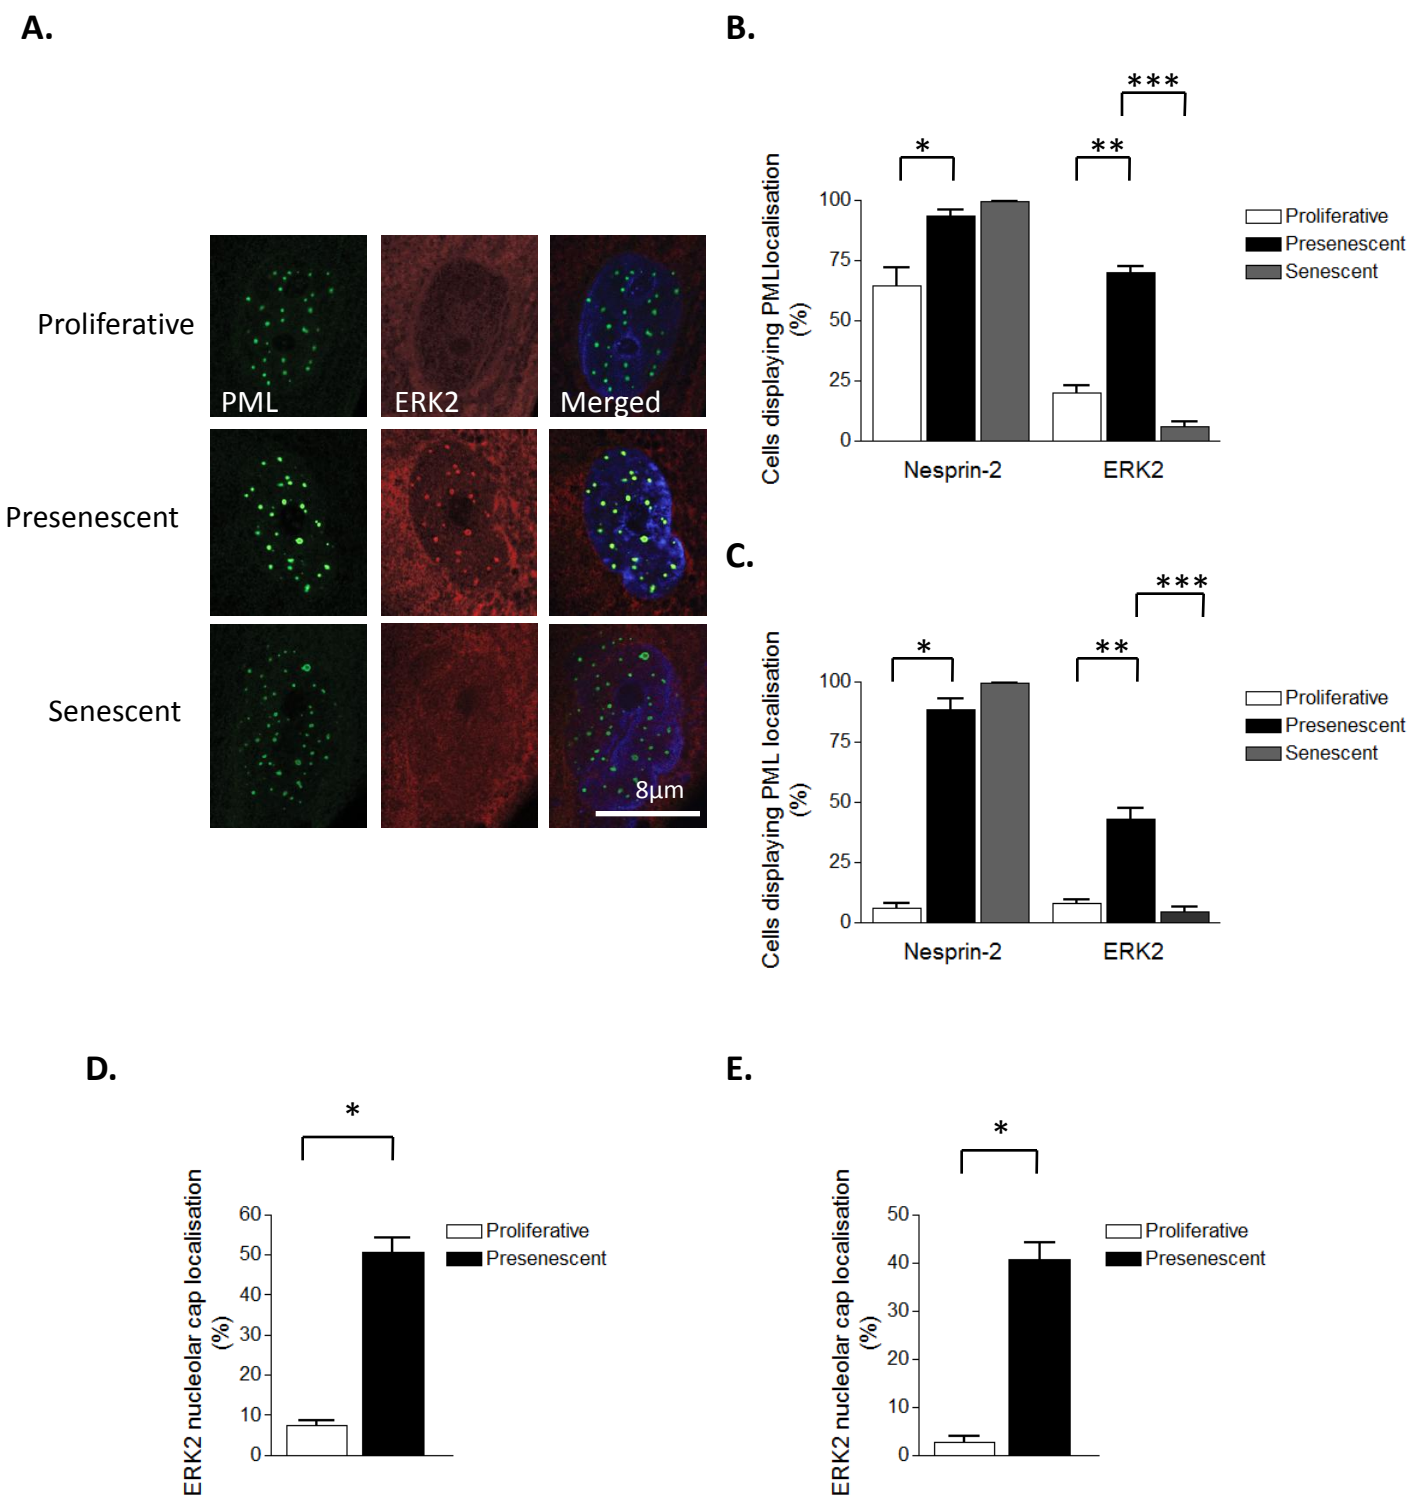

**Supplementary Figure 3.** A) IF analysis of PML (green), ERK2 (red) and DAPI (blue) localisation in proliferative, presenescent and senescent VSMCs. Quantification of nesprin-2 and ERK2 localisation at PML NBs in different primary VSMC isolates B) 35F (\* $p < 0.001$ , \*\* $p < 0.001$  and \*\*\* $p < 0.001$ ) and C) 52M (\* $p = 0.0196$ , \*\* $p = 0.0003$  and \*\*\* $p < 0.0001$ ). ERK2 localisation at nucleolar caps in D) 35F (\* $p = 0.0003$ ) and E) 52M (\* $p < 0.0001$ ) VSMCs. Graphs represent the combined data of 3 independent experiments counting 300 cells per condition.

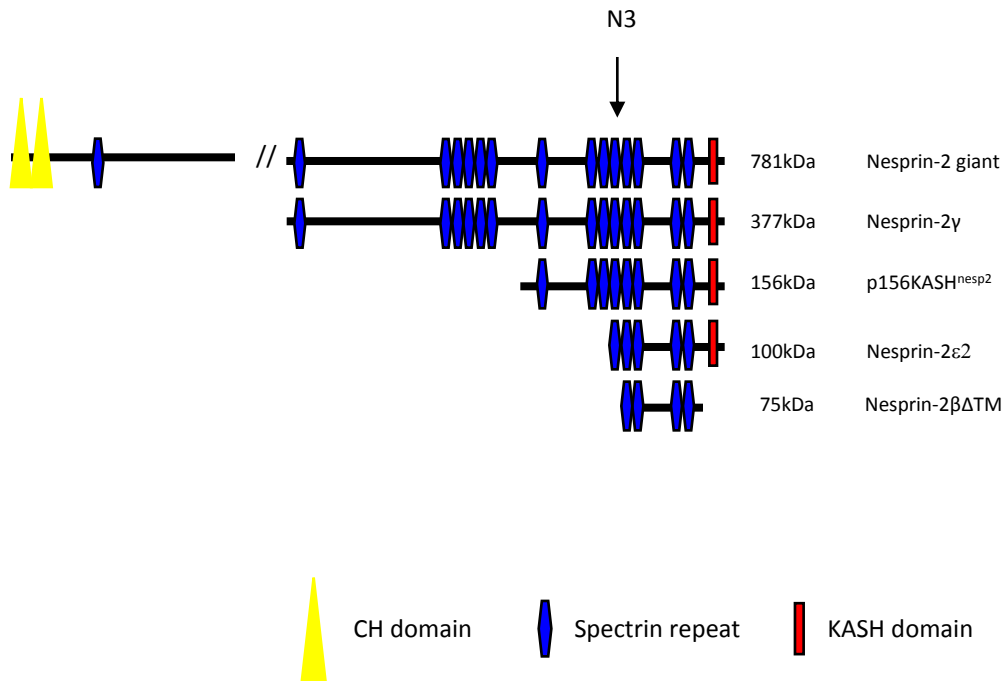

**Supplementary Figure 4.** Schematic representation of published nesprin-2 isoforms. N3 marks the antibody used in this study.

**A.**

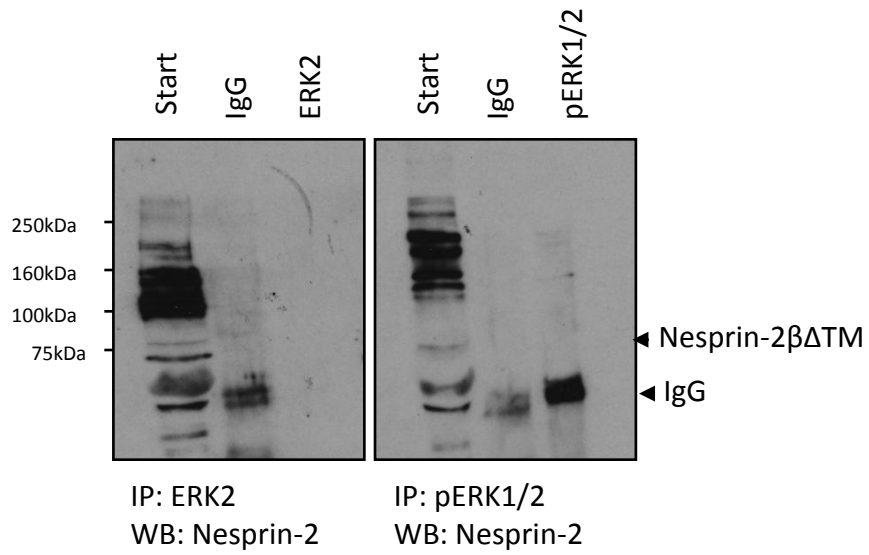

**Supplementary Figure 5.** Loss of Nesprin-2 $\beta\Delta$ TM and ERK2 interaction in senescent VSMCs. A) WB analysis of ERK2 and pERK1/2 IPs from senescent VSMCs. Note the lack of nesprin-2 $\beta\Delta$ TM precipitated by ERK2 and pERK1/2.

**A.**

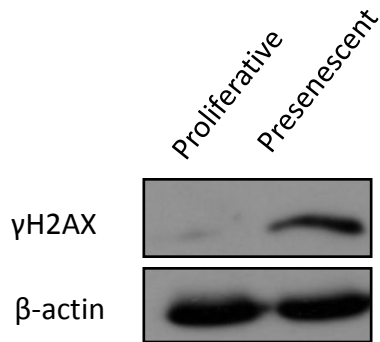

**B.**

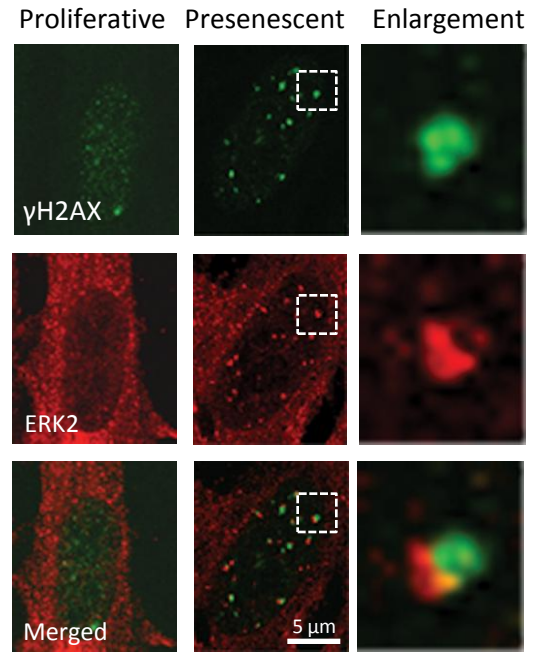

**Supplementary Figure 6.** ERK2 positive PML NBs abut DNA lesions. A) WB showing  $\gamma$ H2AX levels in proliferative and presenescent VSMCs. B) IF showing  $\gamma$ H2AX (green) and ERK2 (red) localisation in proliferative and presenescent VSMCs. Enlargement shows ERK2 localises in close proximity to  $\gamma$ H2AX lesions in presenescent nuclei.

**A.**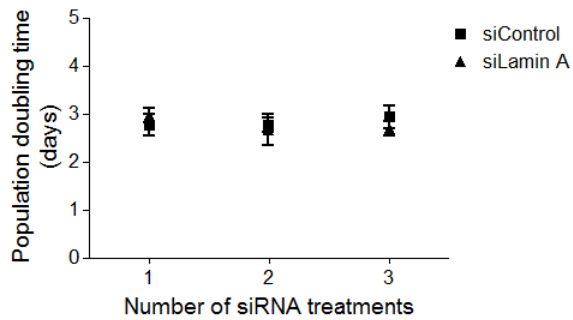**B.**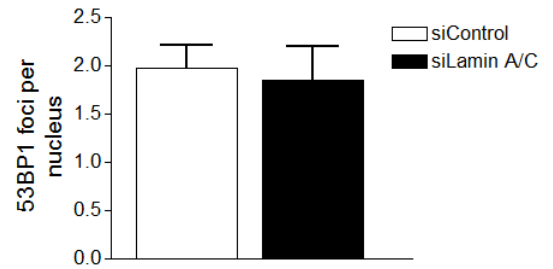**C.**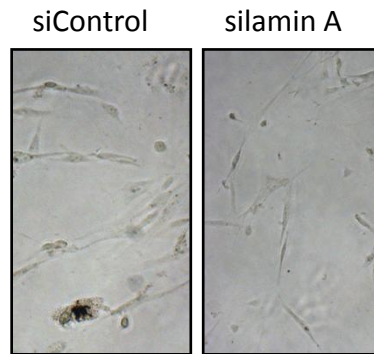

**Supplementary Figure 7.** Prolonged lamin A/C depletion in proliferative VSMCs does not alter PDT, DNA damage response or senescence. A) PDT of control and lamin A/C depleted VSMCs after 3 consecutive rounds of knockdown. Graph shows combined data from 3 individual experiments. B) Average number of 53BP1 foci per in control and lamin A/C nuclei after 3 consecutive rounds of knockdown. C) Images of control and lamin A/C depleted cells stained for SA- $\beta$ -gal after 3 consecutive rounds of knockdown.

**A.**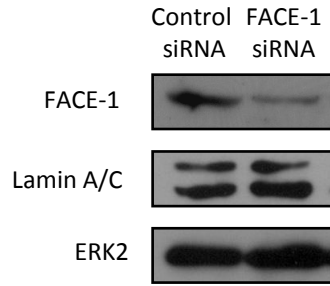**B.**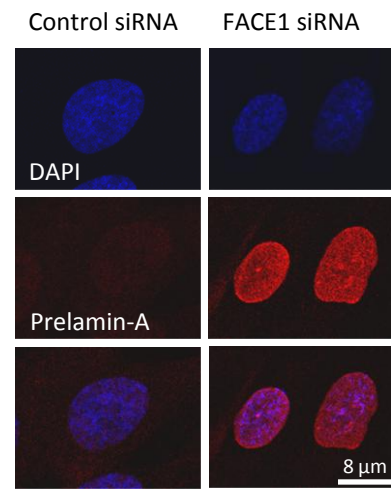

**Supplementary Figure 8.** Validation of the FACE1 depletion strategy. A) WB confirming FACE1 depletion and B) IF confirming prelamin A accumulation in FACE1 depleted VSMCs.



**A.**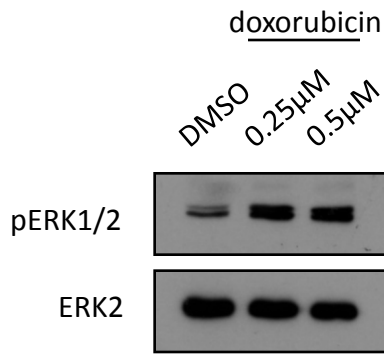**B.**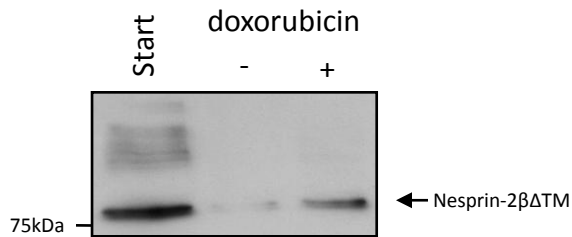

IP: pERK1/2  
WB: Nesprin-2

**C.**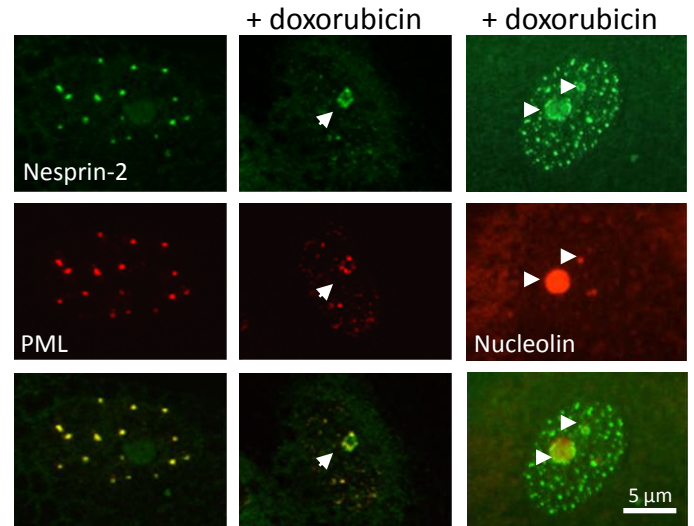**D.**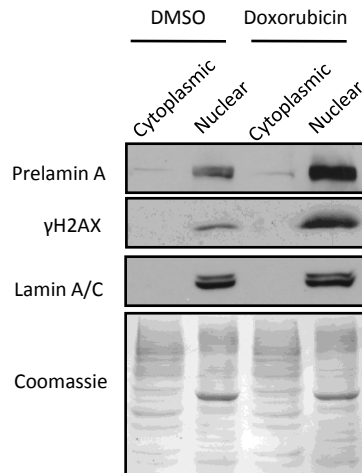

**Supplementary Figure 9.** DNA damage stimulates nesprin-2/ERK association . A) WB of control and doxorubicin treated VSMCs for pERK1/2 and total ERK2. B) IP of pERK1/2 antibody to pellet the 75kDa nesprin-2 $\beta\Delta$ KASH1 variant from control and doxorubicin treated VSMCs. C) IF showing nesprin-2 (green) and PML (red) of control and doxorubicin treated VSMCs. Arrowheads mark the nucleolar cap. Nucleolar caps were confirmed by staining for nesprin-2 (green) and the nucleolar marker nucleolin (red). Arrowheads mark nucleolar caps. D) WB of cytoplasmic and nuclear fractions of control and doxorubicin treated (3hr) VSMCs.

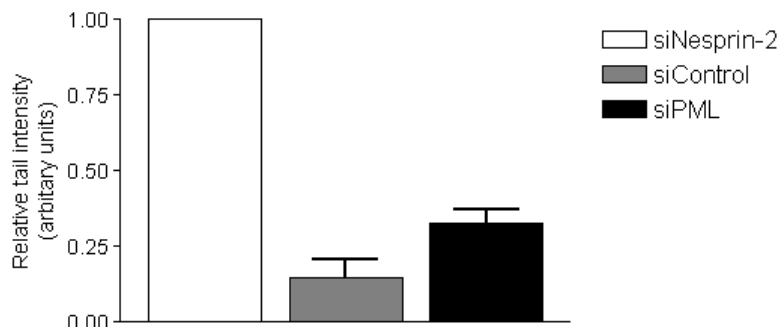

**Supplementary Figure 10.** PML depletion does not induce DNA damage in VSMCs. Quantification of comet tail length of control, nesprin-2 and PML depleted VSMCs.

**A.**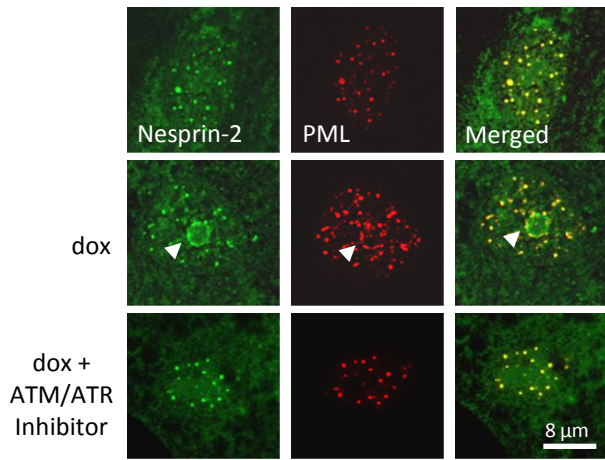**B.**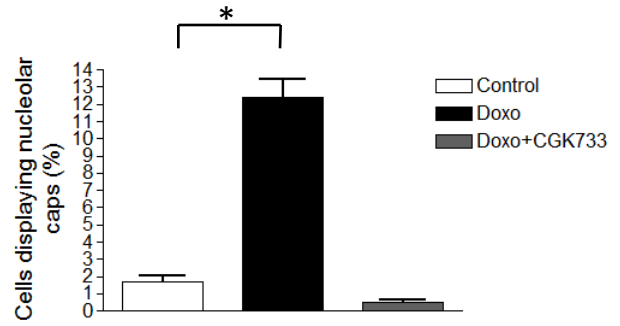**C.**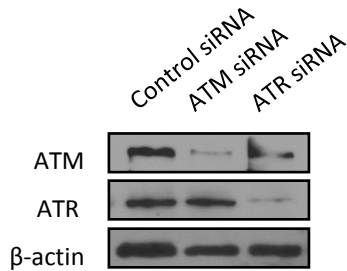**D.**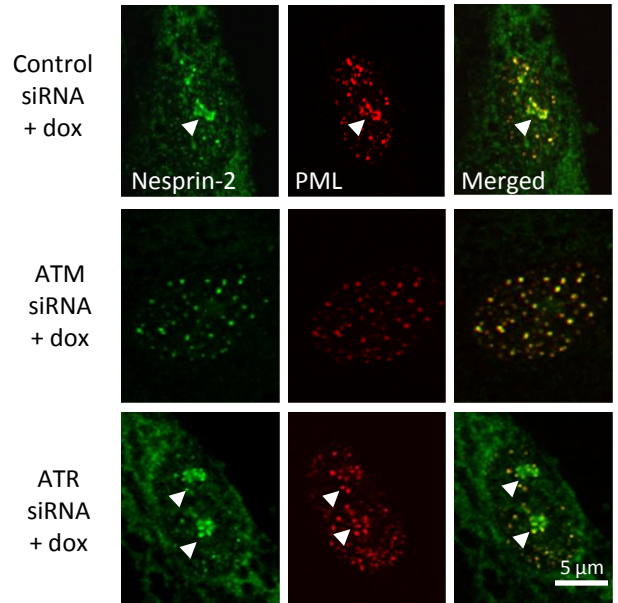**E.**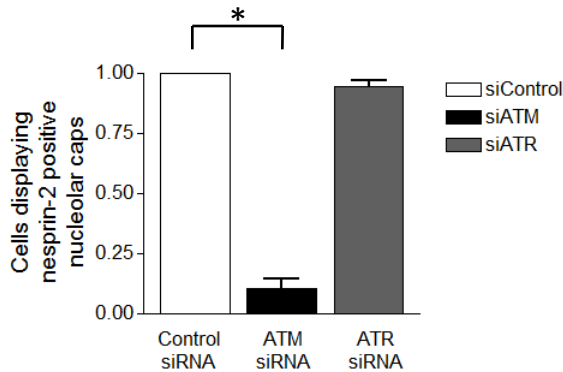

**Supplementary Figure 11.** Formation of nesprin-2/PML nucleolar caps is ATM dependent in VSMCs. Cells were preincubated with either DMSO or the ATM/ATR inhibitor CGK733 for 2 hours prior to doxorubicin treatment. A) IF microscopy showing nesprin-2 (green) and PML (red). Arrowheads mark nucleolar caps. B) Quantification of nesprin-2/PML nucleolar caps in doxorubicin treated control and inhibitor treated VSMCs (\* $p = 0.0005$ ). Graph shows combined data of 3 independent experiments counting 300 cells. C) WB confirmed ATM and ATR knockdown. D) IF showing nesprin-2 (green) and PML (red). E) Quantification of nesprin-2 positive nucleolar caps in doxorubicin treated control, ATM and ATR depleted VSMCs (\* $p = 0.0006$ ). Graph shows combined data of 3 independent experiments counting 300 cells.
